# Supplementary material
Source: publisher figshare collection journal article supplement (https://rs.figshare.com/ndownloader/files/17811176)
Supplement: Supplementary file [file 17811176]

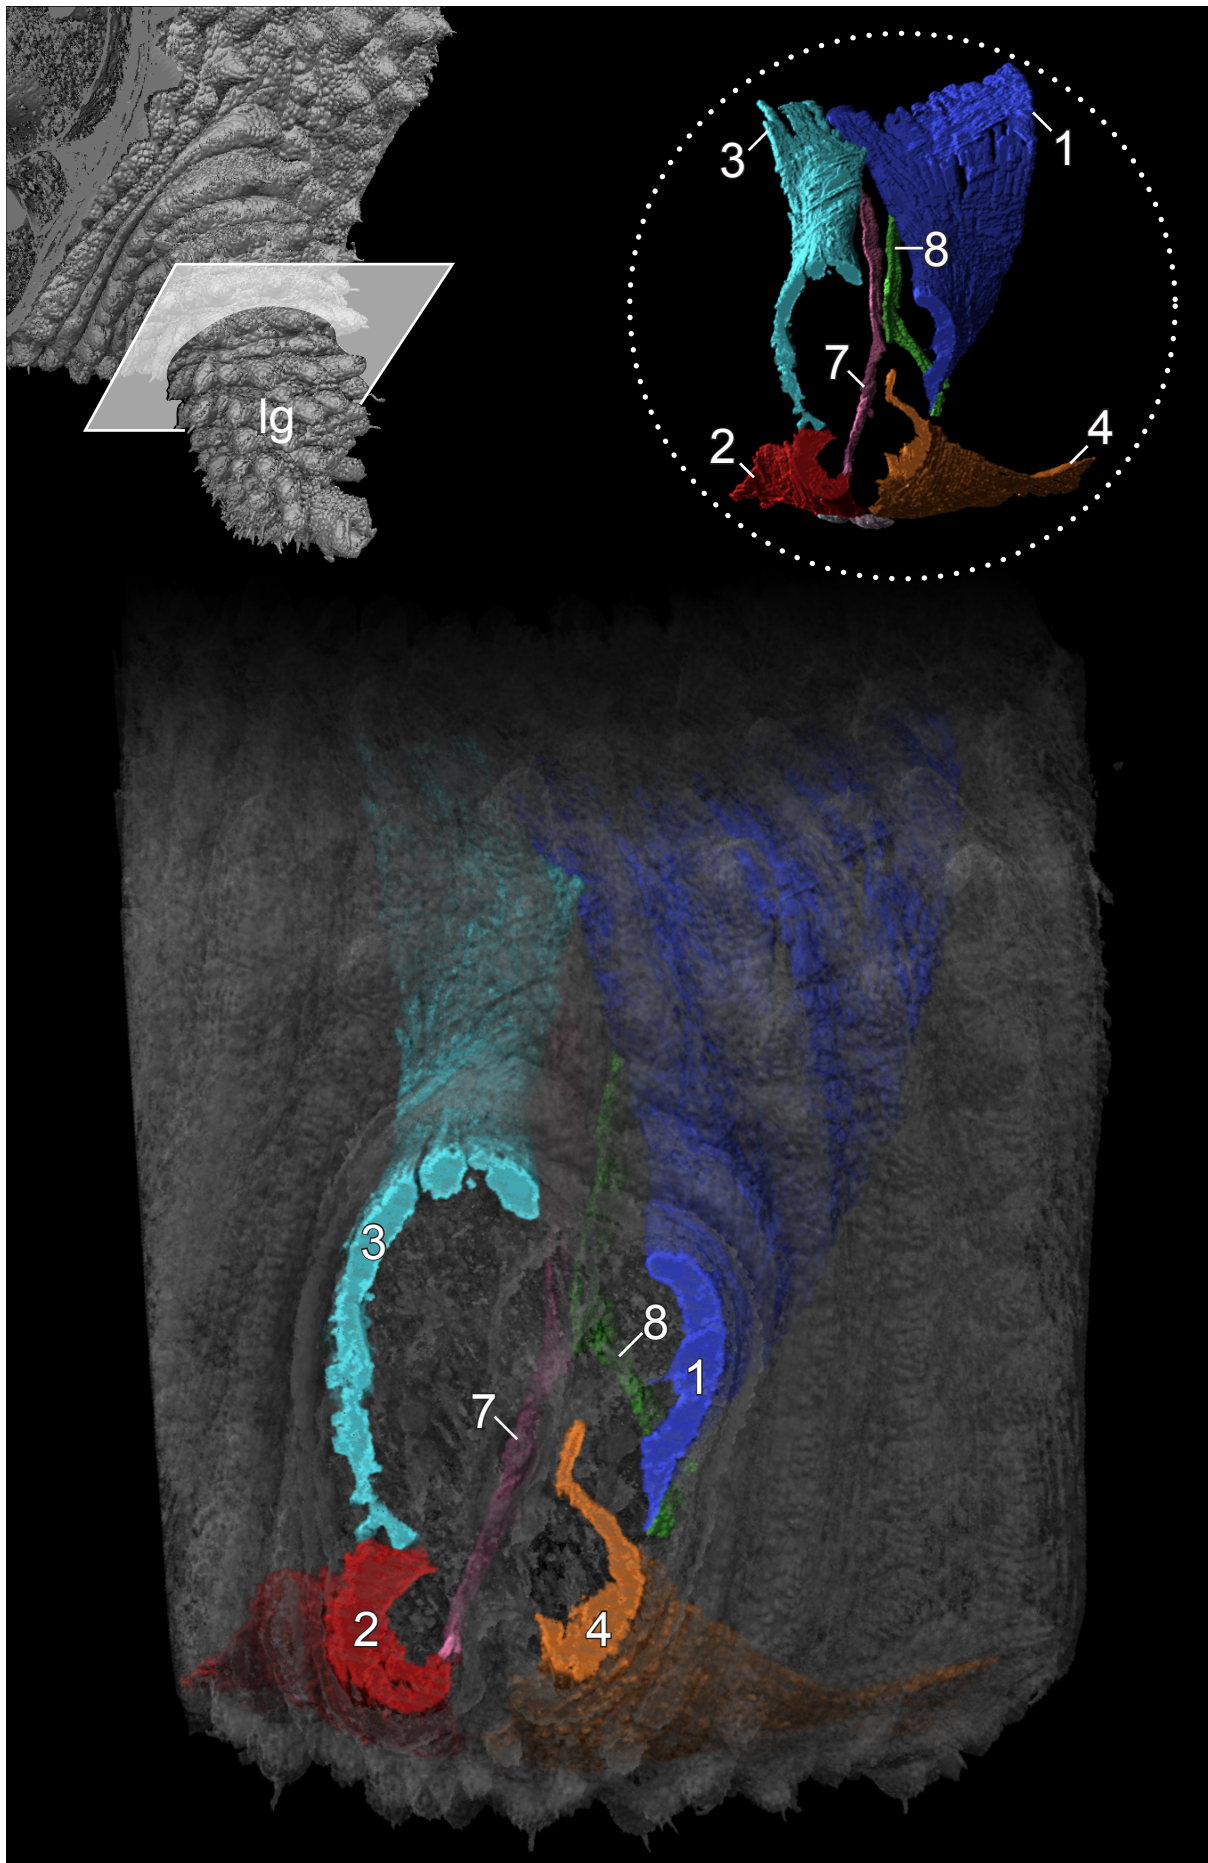

**Supplementary Figure 8. Peripheral arrangement of leg muscles in *E. rowelli*.** Volume rendering based on SRμCT data from left mid-trunk leg illustrating the lobopod in virtual cross section (top left image). Dorsal is up in all images. Body surface is semi-transparent (bottom image). Individual muscles are highlighted in different colours and numbered as in main text (summarised in Table 1). Abbreviation: lg, leg.
